# Supplementary material for: Fluoroalkyl POSS with Dual Functional Groups as a Molecular Filler for Lowering Refractive Indices and Improving Thermomechanical Properties of PMMA
Source: MDPI journal article supplement (doi:10.3390/polym10121332), 2018-12-02
Supplement: s1 [file s1]

## **Supporting Information**

# **Fluoroalkyl POSS with Dual Functional Groups as a Molecular Filler for Lowering Refractive Indices and Improving Thermomechanical Properties of PMMA**

Kazunari Ueda<sup>1,2</sup>, Kazuo Tanaka<sup>1\*</sup> and Yoshiki Chujo<sup>1</sup>

<sup>1</sup>Department of Polymer Chemistry, Graduate School of Engineering, Kyoto University, Katsura, Nishikyo-ku, Kyoto 615-8510, Japan

<sup>2</sup>Matsumoto Yushi-Seiyaku Co., Ltd., 2-1-3, Shibukawa-cho, Yao-City, Osaka 581-0075, Japan

Phone: +81-75-383-2604

Fax: +81-75-383-2605

\*To whom correspondence should be addressed: [tanaka@poly.synchem.kyoto-u.ac.jp](mailto:tanaka@poly.synchem.kyoto-u.ac.jp)

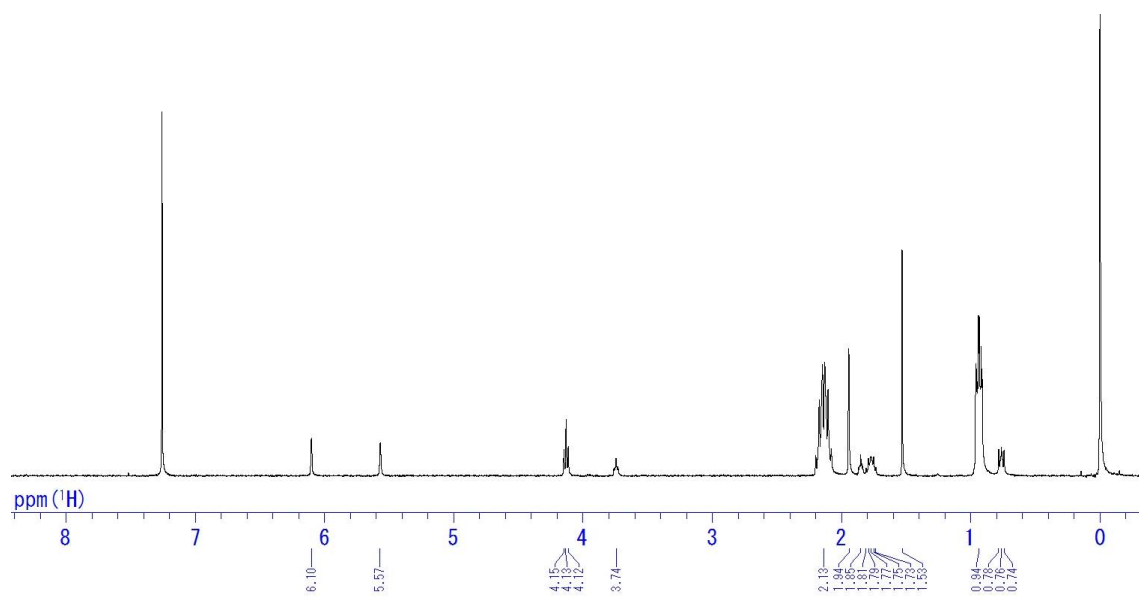

**Chart S1.**  $^1\text{H}$  NMR spectrum of F+MMA POSS in  $\text{CDCl}_3$ .

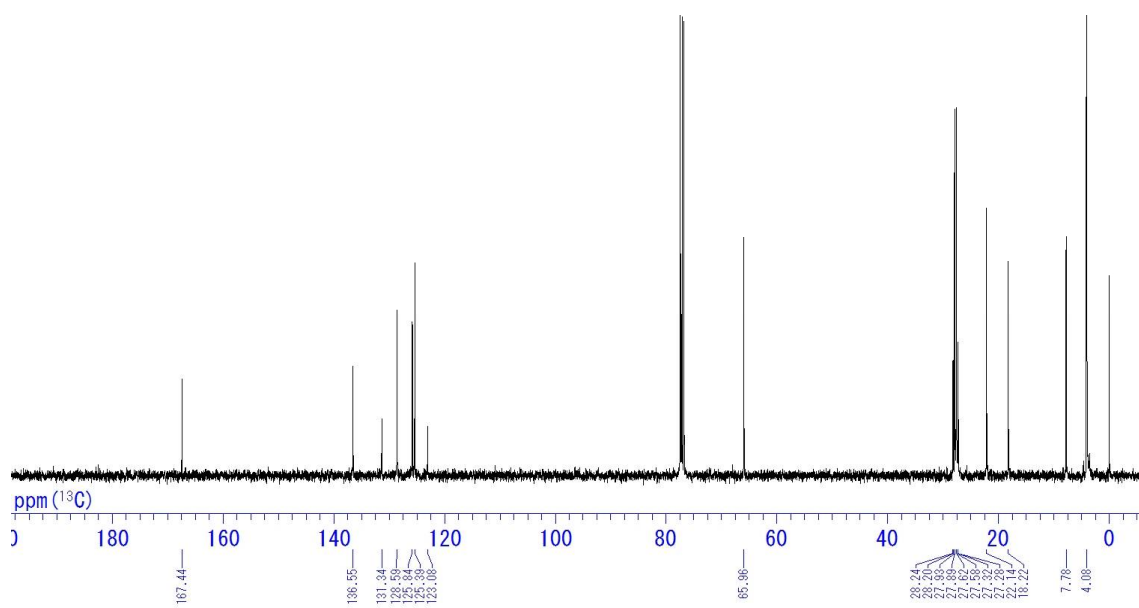

**Chart S2.**  $^{13}\text{C}$  NMR spectrum of F+MMA POSS in  $\text{CDCl}_3$ .

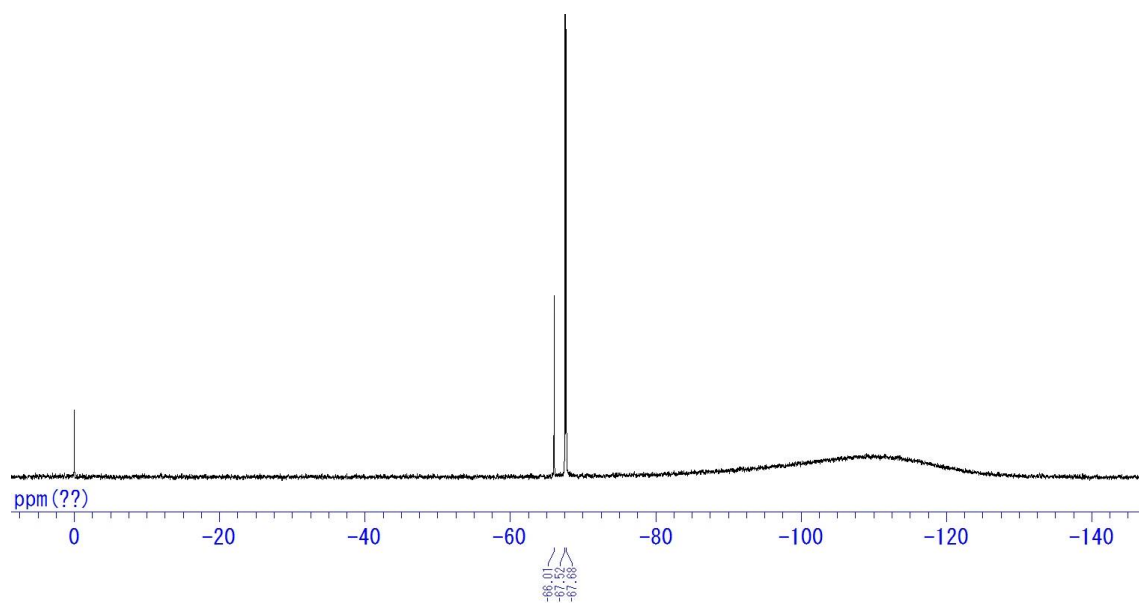

**Chart S3.**  $^{29}\text{Si}$  NMR spectrum of F+MMA POSS in  $\text{CDCl}_3$ .

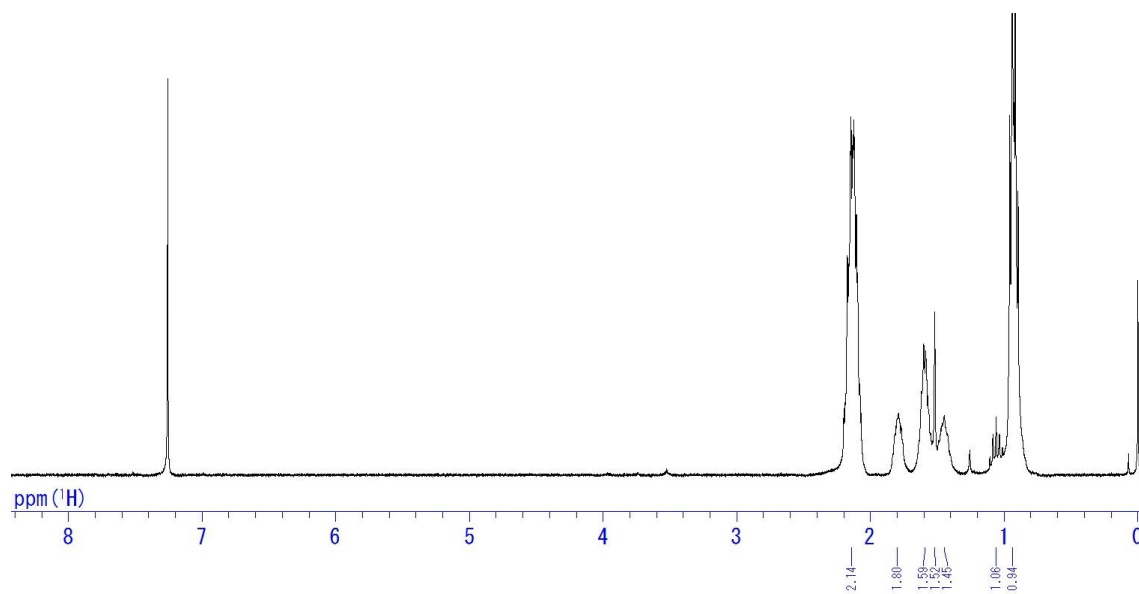

**Chart S4.**  $^1\text{H}$  NMR spectrum of F+CP POSS in  $\text{CDCl}_3$ .

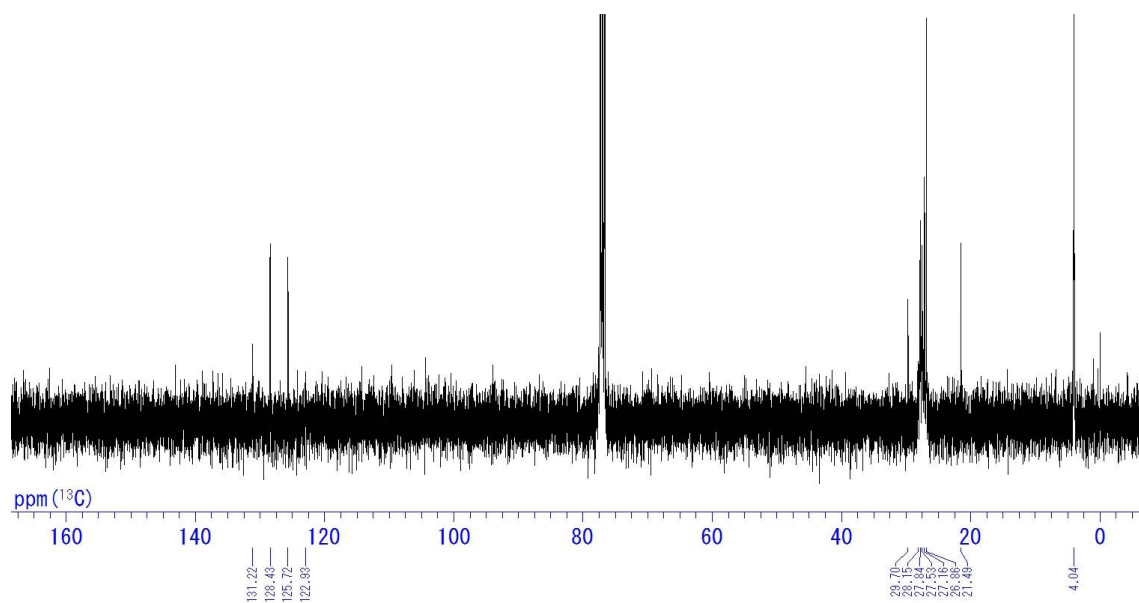

**Chart S5.**  $^{13}\text{C}$  NMR spectrum of F+CP POSS in  $\text{CDCl}_3$ .

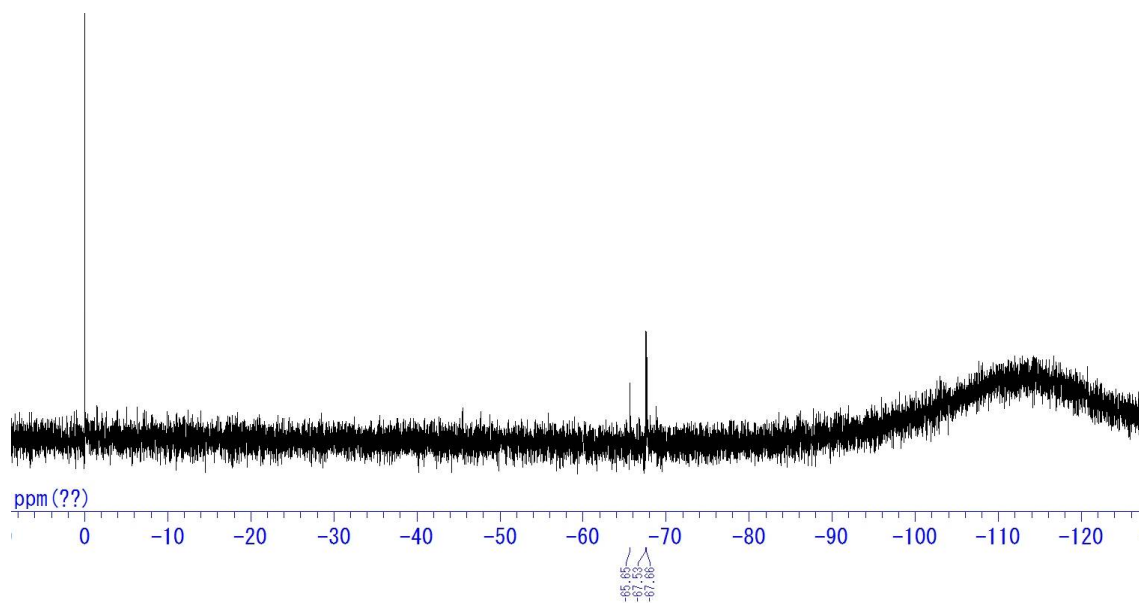

**Chart S6.**  $^{29}\text{Si}$  NMR spectrum of F+CP POSS in  $\text{CDCl}_3$ .



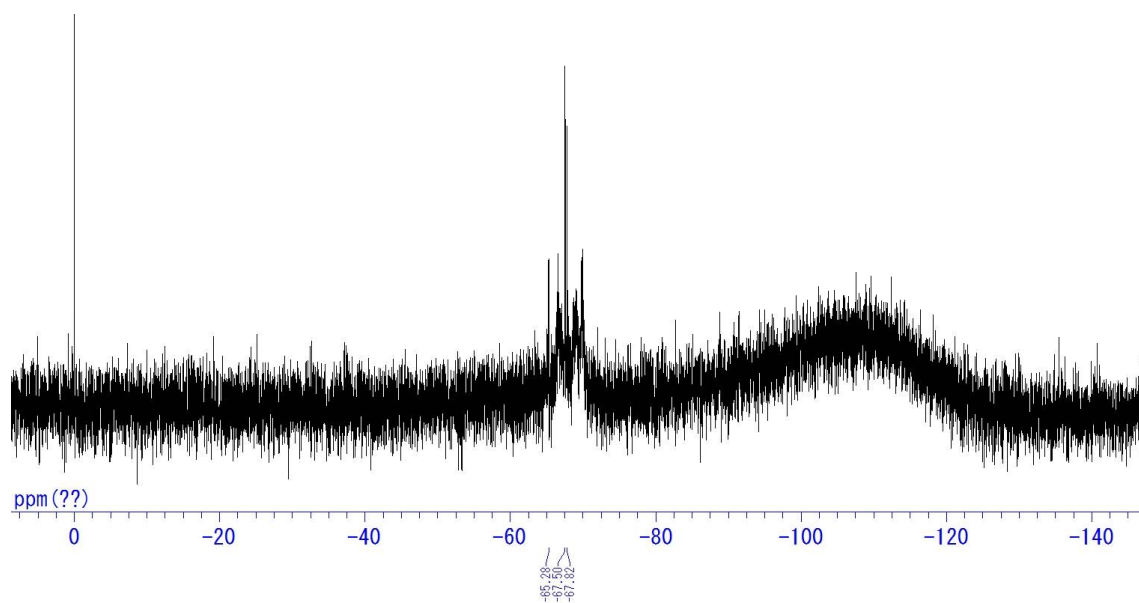

**Chart S9.**  $^{29}\text{Si}$  NMR spectrum of F+C18 POSS in  $\text{CDCl}_3$ .

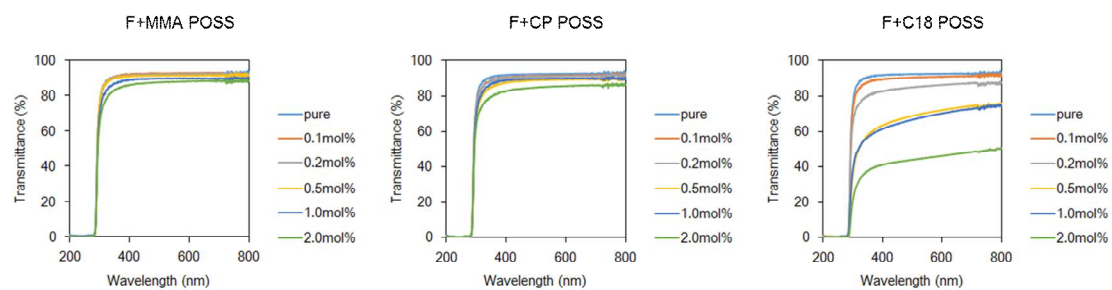

**Figure S1.** UV-vis transmittance spectra of PMMA hybrid films with variable concentrations of POSS fillers.

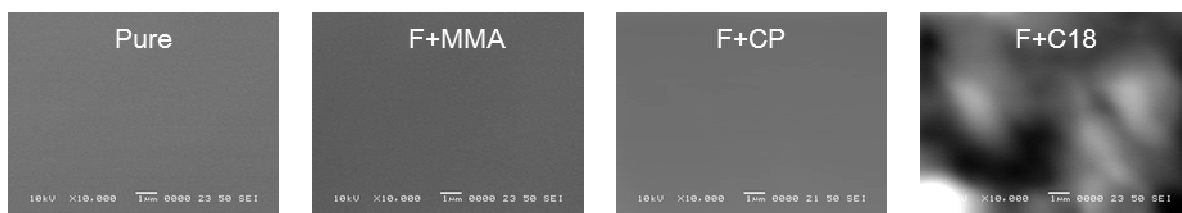

**Figure S2** SEM images of PMMA hybrids containing POSS fillers (2 mol%). Scale bars represent 1  $\mu\text{m}$ .



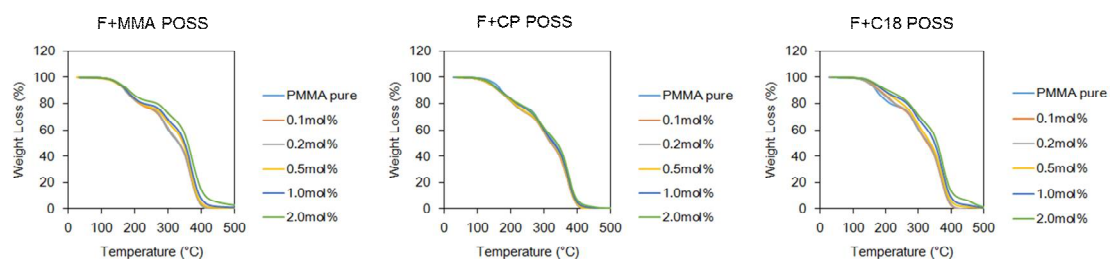

**Figure S3.** TGA thermograms of PMMA hybrids containing POSS fillers with a heating rate of 10 °C/min under nitrogen atmosphere.
